# Supplementary material
Source: PubMed Central journal article supplement (PMC3724216)
Supplement: NIHMS336537-supplement-01.pdf [file NIHMS336537-supplement-01.pdf]

**Supplementary Table 1.** Mean Physical Activity in METS by Study and Quartile

|         | Quartile |      |      |      |
|---------|----------|------|------|------|
|         | 1        | 2    | 3    | 4    |
| DHS III | 1828     | 2060 | 2381 | 3334 |
| DHS IV  | 1906     | 2303 | 2656 | 3564 |
| DHS V   | 395      | 1233 | 2345 | 5845 |
